# Supplementary material for: Glacial-interglacial sea water isotope change near the Chilean Margin as reflected by δ 2 H of C37 alkenones
Source: Copernicus journal article supplement (doi:10.5194/egusphere-2023-1042), 2023-05-25
Supplement: Supplementary file 1 [file egusphere-2023-1042-supplement.zip]

Archive with 2 entries (2 files):
- Supplement/Hydrogen and Oxygen Isotopes-ODP1235.xlsx
- Supplement/Supplementary Information1-KH.pdf
