# Supplementary material for: Glacial-interglacial sea water isotope change near the Chilean Margin as reflected by δ 2 H of C37 alkenones
Source: Copernicus journal article supplement (doi:10.5194/egusphere-2023-1042), 2023-05-25
Supplement: Supplementary file 1 [file egusphere-2023-1042-supplement.zip › Supplement/Hydrogen and Oxygen Isotopes-ODP1235.xlsx]

## Sheet: Parameters
#	Name	Short Name	Unit	Principal Investigator	Method/Device	Comment
1	Leg	Leg		Haettig, Katrin
2	Site	Site		Haettig, Katrin
3	Hole	Hole		Haettig, Katrin
4	Core	Core		Haettig, Katrin
5	Section	Section		Haettig, Katrin
6	Top interval	Top interval	cm	Haettig, Katrin
7	Bottom interval	Bottom interval	cm	Haettig, Katrin
8	Depth	Depth	mbsf	Haettig, Katrin
9	Depth	Depth	mcd	Haettig, Katrin
10	Age	Age	ka BP	Haettig, Katrin		https://doi.pangaea.de/10.1594/PANGAEA.957070
11	Hydrogen isotopic composition of C37 alkenones	δ2H C37	‰ VSMOW	Haettig, Katrin	Thermo Delta V IRMS
12	Standard deviation of Hydrogen isotopic composition of C37 alkenones	δ2H C37 std dev [±]	‰ VSMOW	Haettig, Katrin
13	Hydrogen isotopic composition of C38 alkenones	δ2H C38	‰ VSMOW	Haettig, Katrin	Thermo Delta V IRMS
14	Standard deviation of Hydrogen isotopic composition of C38 alkenones	δ2H C38 std dev [±]	‰ VSMOW	Haettig, Katrin
15	Number of replication analysis of hydrogen isotopes	n		Haettig, Katrin
16	Oxygen isotopic composition of the benthic foraminifera Uvigerina	δ18O Uvigerina	‰ VPDB	Haettig, Katrin	Kiel VI connected to MAT 253
17	Number of replication analysis of oxygen isotopes	n		Haettig, Katrin
18	Standard deviation of Oxygen isotopic composition of the benthic foraminifera Uvigerina	δ18O Uvigerina std dev [±]	‰ VPDB	Haettig, Katrin	Kiel VI connected to MAT 255

## Sheet: ODP1235
Leg	Site	Hole	Core	Section	Top interval (cm)	Bottom interval (cm)	Depth (mbsf)	Depth (mcd)	Age (kyr BP)	δ2H C37 [‰ VSMOW]	δ2H C37 std dev [±]	δ2H C38 [‰ VSMOW]	δ2H C38 std dev [±]	n	δ18O Uvigerina [‰ VPDB]	n	δ18O Uvigerina std dev [±]
202	1235	A	1	1	11	15	0.15	0.15							2.45	2	0.06
202	1235	A	1	1	18	20	0.2	0.2	0.9						2.27	1	0.07
202	1235	A	1	1	33	34	0.34	0.34	1.11	-193	1	-203	8	2
202	1235	A	1	1	47	49	0.49	0.49	1.49
202	1235	A	1	1	63	64	0.64	0.64	2.18	-192	3	-198	3	2
202	1235	A	1	1	86	88	0.88	0.88	4
202	1235	A	1	1	103	104	1.04	1.04	5.56	-193	0	-202	5	2
202	1235	A	1	1	110	112	1.12	1.12	7.48
202	1235	A	1	1	117	119	1.19	1.19	9.06
202	1235	A	1	1	121	123	1.23	1.23	9.85
202	1235	A	1	1	137	140	1.4	1.4	12.7	-186	1	-193	0	2	3.23	2	0.14
202	1235	A	1	2	8	10	1.6	1.6	13.93	-183	1
202	1235	B	1	2	78	80	2.3	2.4	15.44	-185	2	-197	1	2	3.39	2	0.08
202	1235	B	1	4	40	42	4.92	5.02	17.06						3.43	1	0.07
202	1235	A	2	3	106	108	6.88	8.98	18.4	-180	2	-187	3	2	3.86	1	0.05
202	1235	A	2	6	18	20	10.5	12.6	19.56	-178	3	-187	4	2	4	1	0.02
202	1235	C	2	4	39	41	14.91	15.01	20.56	-173	3	-183	10	2	3.71	2	0.13
202	1235	A	3	2	88	90	14.7	17.5	21.77						3.81	1	0.06
202	1235	A	3	2	134	136	15.16	17.96	22.01	-176	0
202	1235	A	3	2	137	139	15.19	17.99	22.02	-178	3	-186	4	2	3.86	3	0.07
202	1235	A	3	3	23	25	15.55	18.35	22.18	-173	1
202	1235	A	3	3	73	75	16.05	18.85	22.39	-177	2
202	1235	A	3	3	112	114	16.44	19.24	22.55	-172	3
202	1235	A	3	3	138	140	16.7	19.5	22.65						3.96	1	0.07
202	1235	B	3	2	70	72	18.72	21.02	23.19	-176	0	-192	1	2
202	1235	B	3	3	18	20	19.7	22	23.54						3.68	1	0.06
202	1235	B	3	3	118	120	20.7	23	23.96	-169	2
202	1235	B	3	4	70	72	21.72	24.02	24.38	-179	0	-185	1	2
202	1235	C	3	3	28	30	22.8	26	25.2						4.15	1	0.05
202	1235	C	3	3	128	130	23.8	27	25.81	-180	1	-189	1	2	4.02	2	0.13
202	1235	C	3	4	128	130	25.3	28.5	26.73
202	1235	C	3	5	130	132	26.82	30.02	27.66	-178	1	-184	5	2	3.13	1	0.04
202	1235	A	4	4	33	35	26.65	31.5	28.56						3.86	1	0.05
202	1235	A	4	5	33	35	28.15	33	29.48	-179	3	-182	7	2	3.51	1	0.03
202	1235	A	4	7	33	35	31.15	36	31.32	-180	1	-172	10	2	3.49	1	0.05
202	1235	C	4	2	129	131	31.81	37.51	32.24						3.56	1	0.05
202	1235	C	4	3	130	132	33.32	39.02	33.17	-178	1	-183	9	2	3.62	1	0.03
202	1235	C	4	5	130	132	36.32	42.02	35	-178	4	-181	9	3
202	1235	B	5	2	59	61	37.61	43.5	35.91
202	1235	B	5	3	59	61	39.11	45	36.83	-180	1	-189	1	2	3.52	2	0.05
202	1235	C	5	2	61	63	40.63	48	38.67	-182	1	-194	2	2
202	1235	C	5	3	61	63	42.13	49.5	39.6
202	1235	C	5	4	61	63	43.63	51		-176	0	-184	1	2	3.28	2	0.02
202	1235	A	6	4	70	72	46.02	54		-181	4	-191	0	2
202	1235	A	6	4	72	74	46.04	54.02		-182	3	-194	8	2
202	1235	B	7	1	118	120	55.7			-181	2
202	1235	B	7	2	88	90	56.99			-177	1	-190	0	2	3.62	1	0.08
202	1235	B	7	3	58	60	58.1			-177	3				3.39	1	0.05
202	1235	B	7	4	28	30	59.3								3.41	1	0.04
202	1235	B	6	4	144	146	50.96	60		-178	1	-186	1	2	3.65	1	0.05
202	1235	B	7	4	146	148	60.48			-180	0			1
202	1235	B	6	6	144	146	53.96	63		-187	2	-196	5	2	3.82	1	0.07
202	1235	B	8	1	44	46	64.46	77							3.72	1	0.06
202	1235	B	8	1	144	146	65.46	78		-191	1	-200	3	2
202	1235	B	8	3	144	146	68.46	81		-188	0	-196	2	2	3.96	1	0.04
202	1235	A	9	1	47	49	69.79	84		-181	4	-190	8	2
202	1235	A	9	2	99	101	71.81	86.02		-185	3	-197	6	3
202	1235	A	9	3	47	49	72.79	87							3.96	1	0.04
202	1235	B	9	2	85	87	75.87	88		-183	3	-190	7	2	3.59	2	0.11
202	1235	B	9	3	33	35	76.85	88.98							3.45	1	0.07
202	1235	B	9	3	135	137	77.87	90		-185	2	-197	9	2
202	1235	B	8	4	85	87	78.87	91							3.77	1	0.04
202	1235	B	9	5	33	35	79.85	91.98		-180	2	-191	1	2
202	1235	B	9	6	85	87	81.87	94		-180	4	-191	5	2	3.82	1	0.03
202	1235	A	11	1	11	13	88.43	104		-181	3	-190	4	2
202	1235	A	11	2	61	63	90.43	106		-178	4	-194	7	2
202	1235	A	11	3	11	13	91.43	107							3.65	1	0.05
202	1235	A	11	3	111	113	92.43	108		-183	0	-197	2	2
202	1235	A	11	5	11	13	94.43	110		-183	1	-190	2	2	3.47	2	0.2
